# Supplementary material for: Fast co-pyrolysis of cellulose and polypropylene using Py-GC/MS and Py-FT-IR
Source: Royal Society of Chemistry journal article supplement (doi:10.1039/c5ra10820a), 2015-01-01
Supplement: c5ra10820a1.pdf [file c5ra10820a1.pdf]

## Supplementary Data

### **Fast Co-Pyrolysis of Cellulose and Polypropylene Using Py-GC/MS and Py-FT-IR**

**Deepak Kumar Ojha <sup>a</sup> and R. Vinu <sup>a,b,\*</sup>**

<sup>a</sup>Department of Chemical Engineering, Indian Institute of Technology Madras, Chennai-600036, India

<sup>b</sup>National Center for Combustion Research and Development, Indian Institute of Technology Madras, Chennai- 600036, India

**Figure S1. 2D-GC/MS total ion chromatogram of pyrolysates obtained from fast pyrolysis of equal composition mixture (C:PP 50:50) at 500 °C.**

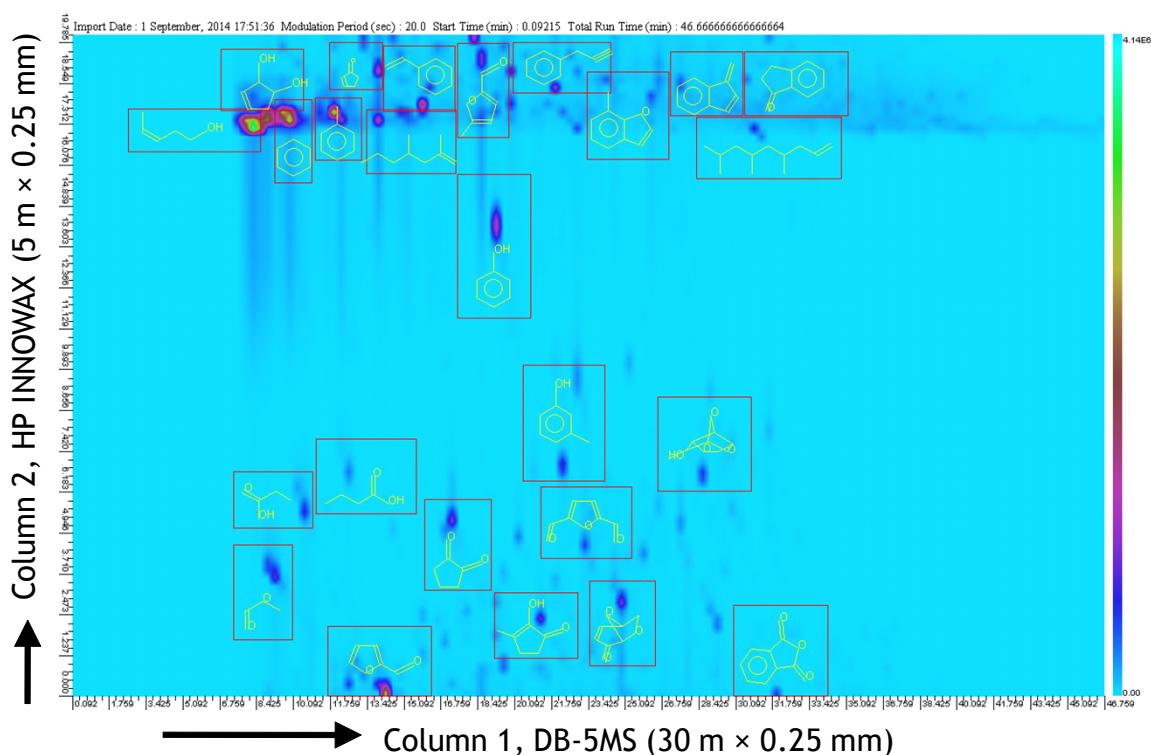

\* Corresponding Author, Phone: +91-44-2257 4178, E-mail: [vinu@iitm.ac.in](mailto:vinu@iitm.ac.in) (R.Vinu)

**Figure S2. Snapshot and construction of Pyroprobe®-FT-IR experimental set-up.**

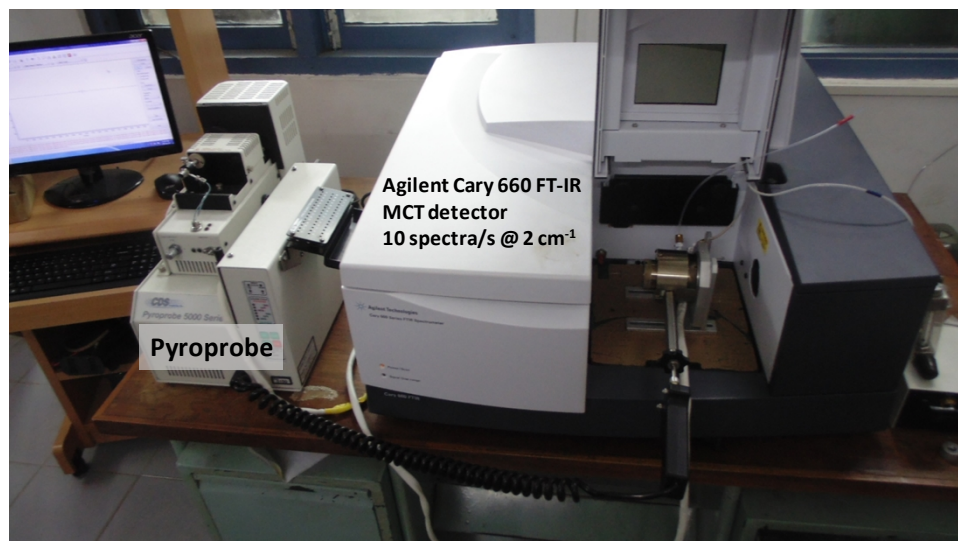

**Table S1. Details of alcohols formed during fast co-pyrolysis of cellulose and polypropylene of different feed composition at 500 °C.**

| Components                                    | C:PP<br>100:0 | C:PP<br>75:25 | C:PP<br>50:50 | C:PP<br>25:75 | C:PP<br>0:100 |
|-----------------------------------------------|---------------|---------------|---------------|---------------|---------------|
| 11-Methyldodecanol                            | 1.26          | 5.46          | 3.17          | 9.53          |               |
| 2-Isopropyl-5-methyl-1-heptanol               | 0.56          | 4.60          | 3.52          | 4.56          |               |
| Cyclopropanol, 1-(3,7-dimethyl-1-octenyl)-    |               | 1.98          | 0.20          | 1.96          |               |
| (2,4,6-Trimethylcyclohexyl) methanol          |               | 1.86          | 5.30          | 4.76          |               |
| (R)-(-)-(Z)-14-Methyl-8-hexadecen-1-ol        |               | 1.71          |               | 0.22          |               |
| 1-Dodecanol, 3,7,11-trimethyl-                |               | 1.62          | 2.00          | 5.64          |               |
| 1-Propanol, 2-methyl-                         |               | 0.83          |               |               |               |
| 6,10,14-Trimethyl-pentadecan-2-ol             |               | 0.74          |               |               |               |
| 2-Nonen-1-ol                                  | 0.18          | 0.52          |               |               |               |
| 11,13-Dimethyl-12-tetradecen-1-ol acetate     |               | 0.50          | 2.71          | 0.13          |               |
| 1-Decanol, 2-hexyl-                           |               | 0.45          | 0.90          | 0.23          |               |
| 1,7-Octadien-3-ol, 2,6-dimethyl-              |               | 0.37          |               |               |               |
| 1-Heptanol, 4-methyl-                         |               | 0.32          |               |               |               |
| 1-Butanol, 2-ethyl-                           |               | 0.21          |               |               |               |
| 2-Decen-1-ol, (E)-                            |               | 0.21          |               |               |               |
| (S)-3,4-Dimethylpentanol                      |               | 0.20          |               | 0.17          |               |
| (2S,3S)-(-)-3-Propyloxiranemethanol           |               | 0.19          |               |               |               |
| 3-Methyl-2-(3-methylpentyl)-3-buten-1-ol      |               | 0.18          |               | 0.61          |               |
| Hexanal, 5,5-dimethyl-                        | 0.25          | 0.17          |               |               |               |
| Nonanal                                       | 0.41          | 0.13          |               | 0.07          |               |
| 1-Octanol, 2-butyl-                           | 0.29          | 0.09          | 0.92          |               |               |
| 3-Pentenal, 4-methyl-                         |               | 0.08          |               |               |               |
| E-10-Pentadecenol                             |               | 0.08          |               |               |               |
| 1-(1-Propynyl)cyclohexanol                    |               | 0.06          | 0.26          |               |               |
| 3-Nonen-1-ol, (E)-                            |               | 0.06          | 0.44          |               |               |
| 2-Octen-1-ol                                  |               | 0.05          | 0.11          |               |               |
| 5,7-Octadien-3-ol, 2,4,4,7-tetramethyl-, (E)- |               | 0.04          |               |               |               |
| (S)-3-Ethyl-4-methylpentanol                  |               | 0.04          |               |               |               |
| Glycidol                                      | 1.04          |               |               |               |               |
| 1,2,3-Cyclohexanetriol                        | 0.88          |               |               |               |               |
| 1-Propen-2-ol, acetate                        | 0.54          |               |               |               |               |
| Cyclohexanol, 2,3-dimethyl-                   | 0.53          |               |               |               |               |
| 2-Pentanol, 5-(2-propynyloxy)-                | 0.44          |               |               |               |               |
| 1,2-Ethanediol, monoacetate                   | 0.37          |               |               |               |               |
| 1,1-Dodecanediol, diacetate                   | 0.11          |               |               |               |               |
| 2,3-Dihydrooxazole, 2-t-butyl-4-(1-hydroxy-1- | 0.10          |               |               |               |               |

|                                             |  |  |      |      |  |
|---------------------------------------------|--|--|------|------|--|
| methylethyl)-3-methoxycarbonyl-5-methyl-    |  |  |      |      |  |
| Methyl tetrahydroionol                      |  |  | 0.91 | 0.56 |  |
| Cyclododecanemethanol                       |  |  |      | 0.53 |  |
| 1-Nonanol, 4,8-dimethyl-                    |  |  |      | 0.44 |  |
| 2-Hexen-1-ol, 2-ethyl-                      |  |  |      | 0.16 |  |
| 11-Dodecen-1-ol, 2,4,6-trimethyl-, (R,R,R)- |  |  |      | 0.14 |  |
| 6-Octenal, 3,7-dimethyl-, (R)-              |  |  |      | 0.11 |  |
| 4-Hepten-1-ol                               |  |  |      | 0.09 |  |
| Cyclopentaneethanol, beta,2,3-trimethyl-    |  |  | 0.10 | 0.07 |  |
| E-2-Octadecadecen-1-ol                      |  |  |      | 0.07 |  |
| 2-Hexyl-1-octanol                           |  |  | 1.12 | 0.03 |  |
| 1-Dodecanol, 2-hexyl-                       |  |  | 2.91 |      |  |
| 11-Dodecen-1-ol, 2,4,6-trimethyl-           |  |  | 1.19 |      |  |
| 3-Hepten-1-ol                               |  |  | 0.43 |      |  |
| 5-Hepten-2-ol, 6-methyl-                    |  |  | 0.38 |      |  |
| 2,6-Dimethyl-octa-2,6-dien-1-ol             |  |  | 0.36 |      |  |
| 1-Decanol, 2-octyl-                         |  |  | 0.32 |      |  |
| 1-Heneicosanol                              |  |  | 0.19 |      |  |
| 1-Octanol, 2,7-dimethyl-                    |  |  | 0.17 |      |  |
| 1-Dodecanol, 2-octyl-                       |  |  | 0.08 |      |  |

**Table S2. Details of aldehydes and ketones formed during fast co-pyrolysis of cellulose and polypropylene of different feed composition at 500 °C.**

| Components                                                               | C:PP<br>100:0 | C:PP<br>75:25 | C:PP<br>50:50 | C:PP<br>25:75 | C:PP<br>0:100 |
|--------------------------------------------------------------------------|---------------|---------------|---------------|---------------|---------------|
| Acetaldehyde, hydroxy-                                                   | 4.66          | 1.66          | 0.40          |               |               |
| 2-Pentanone, 5-hydroxy-                                                  | 3.81          |               |               |               |               |
| 1,2-Cyclopentanedione                                                    | 3.80          | 2.90          | 1.01          | 0.28          |               |
| 2-Cyclopenten-1-one, 2-hydroxy-3-methyl-                                 | 2.38          | 1.07          | 0.80          | 0.20          |               |
| 2-Propanone, 1-hydroxy-                                                  | 2.07          | 0.61          |               |               |               |
| 2-Cyclopenten-1-one, 2-hydroxy-                                          | 1.36          | 1.07          | 0.81          | 0.54          |               |
| Glutaraldehyde                                                           | 1.02          |               |               |               |               |
| 3-Cyclopenten-1-one, 2,2,5,5-tetramethyl-                                | 0.72          | 0.08          |               |               |               |
| Cinnamaldehyde, alpha-methyl-                                            | 0.64          |               |               |               |               |
| 3-Buten-2-one, 3-methyl-                                                 | 0.44          |               |               |               |               |
| 4-Penten-2-one                                                           | 0.43          |               |               |               |               |
| 1,4-Dioxaspiro[2.4]heptan-5-one, 7-methyl-                               | 0.36          |               |               |               |               |
| 1,3-Dioxol-2-one,4,5-dimethyl-                                           | 0.26          |               |               |               |               |
| 1,3-Dioxolane-4,5-dione                                                  | 0.24          |               |               |               |               |
| 2-Buten-1-one, 1-(6,7,7-trimethyl-2,3-dioxabicyclo[2.2.2]oct-5-en-1-yl)- | 0.21          |               |               |               |               |
| 4-Ethyl-2-hydroxycyclopent-2-en-1-one                                    | 0.20          | 0.54          |               | 0.24          |               |
| Cyclohexanone, 2-ethyl-2-propyl-                                         | 0.14          |               |               | 0.07          |               |
| 7-Methylindan-1-one                                                      | 0.13          |               |               |               |               |
| 2-Dodecylcyclohexanone                                                   | 0.12          |               |               |               |               |
| Cyclohexanone, 4-methylidene-                                            | 0.12          |               |               |               |               |
| 2,2-Dimethyl-3-heptanone                                                 | 0.09          |               |               |               |               |
| 2-Cyclohexen-1-one, 4-ethyl-3,4-dimethyl-                                | 0.04          |               |               |               |               |
| 5-Ethyl-4-tridecanone                                                    |               | 0.82          |               |               |               |
| Ethanone, 1-(1,2,2,3-tetramethylcyclopentyl)-, (1R-cis)-                 |               | 0.65          |               |               |               |
| 4-Ethyl-2-hydroxycyclopent-2-en-1-one                                    |               | 0.54          |               |               |               |
| Cyclohexanone, 4-ethoxy-                                                 |               | 0.25          |               |               |               |
| Cyclopentanone, 2-methyl-                                                |               | 0.25          |               |               |               |
| 2-Oxepanone, 4-methyl-                                                   |               | 0.23          |               |               |               |
| 5-Hepten-3-one, 5-ethyl-2-methyl-                                        |               | 0.16          |               |               |               |
| Cyclopentanone, 2-(1-methylpropyl)-                                      |               | 0.16          |               |               |               |
| 3-Pentanone, 2-methyl-                                                   |               | 0.15          |               |               |               |
| 2-Ethyl-5-propylcyclopentanone                                           |               | 0.14          |               |               |               |
| 3-Hepten-2-one, 4-methyl-                                                |               | 0.11          |               |               |               |
| 2-Cyclopenten-1-one, 2-hydroxy-3,4-dimethyl-                             |               | 0.11          |               |               |               |

|                                                               |  |      |      |      |  |
|---------------------------------------------------------------|--|------|------|------|--|
| 1,2-Cyclopentanedione, 3-methyl-                              |  | 0.10 |      |      |  |
| 2-Heptanone, 6-methyl-5-methylene-                            |  | 0.08 |      |      |  |
| Cyclobutanone, 2-(2,6-dimethylheptyl)-                        |  | 0.08 |      |      |  |
| 4-Isopropyl-1,3-cyclohexanedione                              |  | 0.06 |      |      |  |
| Cyclohexanone, 5-methyl-2-(1-methylethyl)-,<br>(2R-cis)-      |  | 0.03 |      |      |  |
| 4,4-Dimethyl-2-cyclopenten-1-one                              |  | 0.02 |      |      |  |
| 5-Ethyl-4-tridecanone                                         |  |      | 0.63 |      |  |
| 2-Cyclohexen-1-one, 2-hydroxy-6-methyl-3-(1-<br>methylethyl)- |  |      | 0.43 |      |  |
| Succindialdehyde                                              |  |      | 0.33 |      |  |
| Cyclohexanone, 4-ethyl-3,4-dimethyl-                          |  |      | 0.33 |      |  |
| 1,4-Dioxaspiro[2.4]heptan-5-one, 6-methyl-                    |  |      | 0.25 |      |  |
| Cyclohexanone, 4-ethoxy-                                      |  |      | 0.25 |      |  |
| 2-Cyclopenten-1-one, 3-ethyl-2-hydroxy-                       |  |      | 0.19 |      |  |
| 1,2-Cyclopentanedione, 3-methyl-                              |  |      | 0.18 |      |  |
| Oxetane, 2-propyl-                                            |  |      | 0.10 |      |  |
| 1,3-Cyclohexanedione, 4-propyl-                               |  |      | 0.09 |      |  |
| 4-Ethyl-2-hydroxycyclopent-2-en-1-one                         |  |      |      | 0.24 |  |
| Bicyclo[3.1.1]heptan-2-one, 6,6-dimethyl-, (1R)-              |  |      |      | 0.20 |  |
| Cyclohexanone, 4-ethoxy-                                      |  |      |      | 0.13 |  |
| Oxiranecarboxaldehyde, 3-methyl-3-(4-methyl-3-<br>pentenyl)-  |  |      |      | 0.13 |  |
| Cyclohexanone, 2-ethyl-2-propyl-                              |  |      |      | 0.07 |  |
| 5-Ethyl-4-tridecanone                                         |  |      |      | 0.03 |  |

**Table S3: Details of hydrocarbons formed during fast co-pyrolysis of cellulose and polypropylene of different feed composition at 500 °C.**

| Components                                                     | C:PP<br>100: 0 | C:PP<br>75:25 | C:PP<br>50:50 | C:PP<br>25:75 | C:PP<br>0:100 |
|----------------------------------------------------------------|----------------|---------------|---------------|---------------|---------------|
| 1-Ethyl-2,2,6-trimethylcyclohexane                             | 0.25           | 0.25          |               |               |               |
| Cyclopentane, (2-methyl-1-propenyl)-                           | 0.13           | 0.13          |               |               |               |
| 1,7-Dimethyl-4-(1-methylethyl)cyclodecane                      | 0.30           | 0.3           | 0.63          | 0.37          | 2.94          |
| 1,19-Eicosadiene                                               |                |               |               | 0.31          | 1.49          |
| 1,7-Octadiene, 2,3,3-trimethyl-                                |                |               |               | 0.27          | 0.62          |
| 1,7-Octadiene, 2,7-dimethyl-                                   |                |               |               |               | 1.00          |
| 10-Heneicosene (c,t)                                           |                |               | 0.13          |               | 0.92          |
| 1-Decene, 2,4-dimethyl-                                        |                | 0.64          | 0.63          | 0.1           | 0.26          |
| 1-Hexene, 2-methyl-                                            |                | 0.17          |               | 0.31          | 1.95          |
| 1-Hexene, 5-methyl-                                            |                |               |               | 0.53          | 0.52          |
| 1-Nonene, 4,6,8-trimethyl-                                     |                | 2.25          | 0.47          | 1.29          | 5.95          |
| 1-Nonylcycloheptane                                            |                |               | 0.09          |               | 0.11          |
| 1-Pentene, 2,4-dimethyl-                                       |                |               | 1.60          | 1.43          | 1.33          |
| 1-Pentene, 2-methyl-                                           |                |               | 1.72          | 1.61          | 2.40          |
| 1-Undecene, 7-methyl-                                          |                |               |               | 1.02          | 0.61          |
| 1-Undecene, 8-methyl-                                          |                |               | 0.24          | 0.2           | 5.58          |
| 2,3,3-Trimethyl-1-hexene                                       |                |               | 0.46          | 0.58          | 1.34          |
| 2,3-Dimethyl-3-heptene, (Z)-                                   |                |               |               |               | 0.29          |
| 2,4-Dimethyl-1-heptene                                         |                |               | 4.07          | 4.08          | 4.34          |
| 2-Decene, 4-methyl-, (Z)-                                      |                |               | 0.27          | 0.79          | 1.41          |
| 2-Hexene, 3,5-dimethyl-                                        |                |               | 0.78          |               | 2.89          |
| 2-Octene, 3,7-dimethyl-, (Z)-                                  |                |               |               | 0.43          | 1.15          |
| 3-Decene, 2,2-dimethyl-, (E)-                                  |                |               |               |               | 0.33          |
| 3-Eicosene, (E)-                                               |                | 0.30          |               | 1.31          | 8.34          |
| 3-Undecene, 4-methyl-                                          |                |               |               | 0.38          | 0.65          |
| 5-Ethyl-1-nonene                                               |                |               |               | 0.9           | 0.12          |
| 7-Octadecyne, 2-methyl-                                        |                | 0.29          |               |               | 4.83          |
| 9-Eicosene, (E)-                                               |                |               |               |               | 3.16          |
| 9-Hexacosene                                                   |                |               | 0.41          | 0.18          | 1.17          |
| Bicyclo[3.1.1]heptane, 2,6,6-trimethyl-                        |                |               |               |               | 1.29          |
| Cyclohexane, 1,3,5-trimethyl-                                  |                | 0.13          | 0.57          | 1.08          | 1.43          |
| Cyclooctane, 1,4-dimethyl-, cis-                               |                |               |               |               | 3.92          |
| Cyclooctane, 1,5-dimethyl-                                     |                |               |               | 0.23          | 0.28          |
| Cyclopentane, 1,1,3,4-tetramethyl-, cis-                       |                |               |               | 0.32          | 0.58          |
| Cyclopentane, 1,1'-[3-(2-cyclopentylethyl)-1,5-pentanediy]bis- |                | 0.36          | 0.73          | 0.21          | 1.43          |

|                                                        |  |      |      |      |      |
|--------------------------------------------------------|--|------|------|------|------|
| Cyclopentane, 1,3-dimethyl-, cis-                      |  |      | 0.23 |      | 0.28 |
| Cyclopropane, 1-methyl-1-(2-methylpropyl)-2-nonyl-     |  |      |      |      | 0.53 |
| Decane, 2,3,5,8-tetramethyl-                           |  |      |      | 0.27 | 1.15 |
| Heptane, 4-methyl-                                     |  | 0.42 | 1.8  | 1.17 | 1.76 |
| Nonane, 2,6-dimethyl-                                  |  |      | 0.48 | 0.81 | 1.22 |
| Nonane, 2-methyl-3-methylene-                          |  |      | 1.21 | 0.85 | 2.36 |
| Pentane                                                |  | 2.17 | 1.85 | 2.42 | 3.41 |
| Propene                                                |  |      | 2.17 | 1.62 | 2.26 |
| trans-2-Methyl-3-octene                                |  |      |      |      | 1.36 |
| (-)-trans-Pinane                                       |  | 0.03 |      |      | 0.17 |
| 1,1-Dimethyl-4-methylenecyclohexane                    |  | 0.1  |      | 0.19 | 0.32 |
| 1,3-Pentadiene, 2,3-dimethyl-                          |  |      |      | 0.77 | 0.55 |
| 1-Hexadecyne                                           |  |      |      |      | 0.10 |
| 1-Hexene, 3,3,5-trimethyl-                             |  | 0.19 | 0.25 | 0.8  | 0.32 |
| 1-Isopropyl-1,4,5-trimethylcyclohexane                 |  | 0.17 |      |      | 0.48 |
| 2,4-Dimethyl 1,4-pentadiene                            |  |      | 0.34 | 0.58 | 0.29 |
| 2-Hexadecene, 3,7,11,15-tetramethyl-                   |  | 0.49 | 0.29 |      | 0.07 |
| 2-Undecene, 4,5-dimethyl-                              |  |      | 1.24 |      | 0.88 |
| 3-Eicosyne                                             |  |      | 0.11 |      | 0.61 |
| 3-Tetradecene, (Z)-                                    |  |      |      |      | 0.21 |
| 4-Methyldocosane                                       |  |      |      |      | 0.10 |
| 5-Methyl-2-hexene,c&t                                  |  |      |      |      | 0.08 |
| cis-1,4-Dimethyl-2-methylenecyclohexane                |  |      |      | 0.25 | 0.16 |
| Cyclobutane, 1,1-dimethyl-3-methylene-                 |  |      |      |      | 0.06 |
| Cyclohexane, 1,1'-(1,2-dimethyl-1,2-ethanediyl)bis-    |  |      |      |      | 0.17 |
| Cyclohexane, 1,1,3-trimethyl-2-(3-methylpentyl)-       |  |      |      |      | 0.22 |
| Cyclohexane, 1,2-diethyl-3-methyl-                     |  |      | 0.38 |      | 0.51 |
| Cyclohexane, 1,3-dimethyl-2-methylene-, trans-         |  |      |      |      | 0.13 |
| Cyclohexane, 2,4-diethyl-1-methyl-                     |  |      | 0.31 | 0.87 | 0.41 |
| Cyclohexane, 2-butyl-1,1,3-trimethyl-                  |  |      |      |      | 0.18 |
| Cyclooctane, 1,4-dimethyl-, trans-                     |  | 1.55 | 2.25 | 2.66 | 0.97 |
| Cyclopropane, 1-(1,2-dimethylpropyl)-1-methyl-2-nonyl- |  | 0.63 |      |      | 0.32 |
| Cyclopropane, trimethylmethylene-                      |  |      | 0.73 | 0.48 | 0.38 |
| Heptane, 2,3,6-trimethyl-                              |  |      |      |      | 0.44 |
| Octane, 3,3-dimethyl-                                  |  |      |      | 0.28 | 0.38 |
| Undecane, 6-cyclohexyl-                                |  |      |      | 0.11 | 0.08 |
| 1,3-Hexadiene, 3-ethyl-2-methyl-, (Z)-                 |  |      |      |      | 0.18 |



|                                                         |  |      |      |      |      |
|---------------------------------------------------------|--|------|------|------|------|
| 1-Nonene                                                |  |      |      |      | 0.15 |
| 3,4-Heptadiene                                          |  |      |      |      | 0.84 |
| 3-Octadecene, (E)-                                      |  |      |      |      | 0.19 |
| 7-Hexadecene, (Z)-                                      |  | 0.18 |      |      | 0.13 |
| Cyclohexane, 1,1-dimethyl-2-propyl-                     |  | 0.45 |      |      | 0.20 |
| Cyclohexane, 1,2-diethyl-3-methyl-                      |  |      |      |      | 1.01 |
| Cyclohexane, 2-propyl-1,1,3-trimethyl-                  |  |      |      |      | 0.35 |
| Cyclopentane, 1,3-dimethyl-2-(1-methylethenyl)-         |  |      |      |      | 0.22 |
| Dodecane, 1-cyclopentyl-4-(3-cyclopentylpropyl)-        |  | 0.12 | 0.28 | 0.06 | 0.62 |
| Heptadecane, 2,6,10,15-tetramethyl-                     |  | 0.25 | 0.17 | 0.29 | 0.14 |
| Hexane, 1-(isopropylidencyclopropyl)-                   |  |      |      |      | 0.35 |
| Tridecane, 7-methylene-                                 |  |      |      |      | 0.26 |
| 2-Heptene, 4-methyl-, (E)-                              |  |      | 0.23 | 2.24 |      |
| 11-Tricosene                                            |  | 0.81 |      | 1.75 |      |
| Bicyclo[3.1.1]heptane, 2,6,6-trimethyl-                 |  | 0.21 |      | 0.80 |      |
| 1-Tridecene                                             |  |      |      | 0.25 |      |
| 2-Decene, 7-methyl-, (Z)-                               |  |      |      | 0.43 |      |
| Heptane, 2-methyl-3-methylene-                          |  |      | 0.24 | 0.22 |      |
| Cyclopropane, 1-(1,1-dimethylethyl)-2-methylene-        |  |      |      | 0.64 |      |
| 1-Hexyne, 5-methyl-                                     |  |      | 0.67 | 0.60 |      |
| Cyclopentane, 1,2,3,4,5-pentamethyl-                    |  | 0.7  | 0.5  | 0.53 |      |
| 1,6-Octadiene, 2,6-dimethyl-, (Z)-                      |  |      |      | 0.35 |      |
| Heptane, 3-ethyl-                                       |  |      |      | 0.34 |      |
| Cyclohexene, 3,3,5-trimethyl-                           |  |      |      | 0.28 |      |
| Cyclohexane, 1,1,4,4-tetramethyl-                       |  |      |      | 0.23 |      |
| Cyclohexane, 1-ethyl-2-propyl-                          |  |      |      | 0.21 |      |
| 1-Octene, 3-methyl-                                     |  |      |      | 0.13 |      |
| 4-Undecene, 8-methyl-, (Z)-                             |  |      |      | 0.12 |      |
| 1-Heptene, 2-methyl-                                    |  |      |      | 0.12 |      |
| Tetramethyl-cyclohexane                                 |  | 0.19 |      | 0.12 |      |
| Cyclohexane, 1-(1,5-dimethylhexyl)-4-(4-methylpentyl)-  |  | 0.17 |      | 0.10 |      |
| Cyclopentane, 1-ethenyl-3-ethyl-2-methyl-               |  |      |      | 0.09 |      |
| 3-Tridecene                                             |  |      |      | 0.07 |      |
| 2-Butene, 2-methyl-                                     |  | 0.1  |      | 0.22 |      |
| Cyclopropane, 2-(1,1-dimethyl-2-propenyl)-1,1-dimethyl- |  |      |      | 0.19 |      |
| Tetracontane, 3,5,24-trimethyl-                         |  |      |      | 0.18 |      |
| 3-Octyne, 2-methyl-                                     |  |      |      | 0.16 |      |

|                                                       |  |      |      |      |  |
|-------------------------------------------------------|--|------|------|------|--|
| Dodecane, 2,7,10-trimethyl-                           |  |      |      | 0.14 |  |
| 2-Butene                                              |  |      |      | 0.14 |  |
| Heptadecane, 2,6-dimethyl-                            |  | 0.21 |      | 0.11 |  |
| 1,3-Dimethyl-5-n-decylcyclohexane                     |  | 0.09 |      | 0.11 |  |
| Undecane, 6-cyclohexyl-                               |  |      |      | 0.11 |  |
| Eicosene, (E)-                                        |  |      | 4.00 |      |  |
| Cyclotetradecane, 1,7,11-trimethyl-4-(1-methylethyl)- |  |      |      | 0.94 |  |
| 1-Methylpentyl cyclopropane                           |  |      |      | 0.59 |  |
| 1-Heptene, 6-methyl-                                  |  |      |      | 0.87 |  |
| Cyclohexane, 1,2,3-trimethyl-                         |  |      |      | 0.48 |  |
| 1-Nonyne                                              |  |      |      | 0.21 |  |
| Cyclohexane, 1,2,3,4,5,6-hexaethyl-                   |  |      |      | 0.57 |  |
| 1-Octyne                                              |  |      |      | 0.37 |  |
| 3,5-Dimethylcyclopentene                              |  |      |      | 0.28 |  |
| 3-Octene, 2,2-dimethyl-                               |  |      |      | 0.20 |  |
| 1-Cyclohexylheptene                                   |  |      |      | 0.11 |  |
| 2,4-Dimethyl-1-hexene                                 |  | 0.19 | 0.08 |      |  |
| Heptane, 5-ethyl-2-methyl-                            |  | 0.44 | 0.70 |      |  |
| 1-Hexene, 4,5-dimethyl-                               |  |      | 0.38 |      |  |
| 1,3-Pentadiene, 2,4-dimethyl-                         |  |      | 0.35 |      |  |
| 2-Methyl-Z-4-tetradecene                              |  |      | 0.33 |      |  |
| Cyclopentane, (3-methylbutyl)-                        |  |      | 0.29 |      |  |
| 1,3-Dimethyl-1-cyclohexene                            |  | 0.27 | 0.21 |      |  |
| Dodecane, 2,6,11-trimethyl-                           |  |      | 0.20 |      |  |
| Cyclopentene, 4,4-dimethyl-                           |  |      | 0.19 |      |  |
| Cyclopentane, (2-hexyloctyl)-                         |  | 0.11 | 0.12 |      |  |
| 1-Octene, 3,7-dimethyl-                               |  |      | 0.11 |      |  |
| 2,4-Hexadiene                                         |  | 0.06 |      |      |  |
| 1,6-Octadiene, 2,5-dimethyl-, (E)-                    |  | 0.32 |      |      |  |
| 1-Cyclohexylnonene                                    |  | 0.14 |      |      |  |
| 3-Heptene, 2-methyl-, (E)-                            |  | 0.57 |      |      |  |
| cis,cis,cis-1-Isobutyl-2,5-dimethylcyclohexane        |  | 0.14 |      |      |  |
| cis-1-Butyl-2-methylcyclopropane                      |  | 0.12 |      |      |  |
| Cyclobutane, (1-methylethylidene)-                    |  | 0.15 |      |      |  |
| Cyclohexane, 1,1,2-trimethyl-                         |  | 0.10 |      |      |  |
| Cyclohexane, 1,3,5-trimethyl-2-octadecyl-             |  | 0.13 |      |      |  |
| Cyclohexane, 1,4-dimethyl-2-octadecyl-                |  | 0.19 |      |      |  |
| Cyclooctane, 1-methyl-3-propyl-                       |  | 0.34 |      |      |  |
| Cyclopentane, (1-methylethyl)-                        |  | 0.02 |      |      |  |
| Cyclopropane, 1-(1-methylethyl)-2-nonyl-              |  | 0.08 |      |      |  |

|                                              |  |      |  |  |  |
|----------------------------------------------|--|------|--|--|--|
| Decane, 2,4,6-trimethyl-                     |  | 0.11 |  |  |  |
| Mesitylene                                   |  | 0.19 |  |  |  |
| Propane                                      |  | 0.82 |  |  |  |
| 1-Cyclohexyl-1-(4-ethylcyclohexyl)ethane     |  | 0.11 |  |  |  |
| 1-Heptene, 3-methyl-                         |  | 0.31 |  |  |  |
| 1-Heptene, 4-methyl-                         |  | 0.38 |  |  |  |
| 1H-Indene, 3-methyl-                         |  | 0.26 |  |  |  |
| Cyclohexane, 1,2,4-trimethyl-                |  | 0.40 |  |  |  |
| Cyclohexane, 1,3-dimethyl-2-methylene-, cis- |  | 0.13 |  |  |  |
| Cyclopentane, 1-butyl-2-ethyl-               |  | 0.77 |  |  |  |
| Hexen-1-ylcyclohexane                        |  | 0.11 |  |  |  |
| Isobutane                                    |  | 0.23 |  |  |  |

**Table S4. Details of acids and esters formed during fast co-pyrolysis of cellulose and polypropylene of different feed composition at 500 °C.**

| Components                                                    | C:PP<br>100:0 | C:PP<br>75:25 | C:PP<br>50:50 | C:PP<br>25:75 | C:PP<br>0:100 |
|---------------------------------------------------------------|---------------|---------------|---------------|---------------|---------------|
| Propanoic acid, 2-oxo-                                        | 1.61          |               |               |               |               |
| 2-Hydroxy-6-methyl-3-cyclohexen-1-carboxylic acid             | 0.35          | 0.06          |               |               |               |
| Hexanoic acid, 2-acetyl-, ethyl ester                         | 1.07          |               |               |               |               |
| Acetic acid, oxo-                                             | 0.24          |               |               |               |               |
| Cyclohexan-1,4,5-triol-3-one-1-carboxylic acid                | 0.21          |               |               |               |               |
| 2-Propenoic acid, methyl ester                                | 0.15          |               |               |               |               |
| 2-Propenoic acid, 2-methyl-, 3,3,5-trimethylcyclohexyl ester  | 0.12          |               |               |               |               |
| Butanedioic acid, 2,3-bis(acetyloxy)-                         | 0.31          |               |               |               |               |
| Butanoic acid, 2-methyl-2-(1-methylethyl)-3-oxo-, ethyl ester | 0.65          |               |               |               |               |
| 2-Ethylbutyric acid, eicosyl ester                            |               | 0.22          |               |               |               |
| Hexadecanoic acid, 2-oxo-, methyl ester                       |               | 0.14          |               |               |               |
| Cyclopropane carboxylic acid, 2-methylene-, methyl ester      |               | 0.13          |               |               |               |
| 6-Nonenoic acid, methyl ester                                 |               | 0.07          |               |               |               |
| Butanoic acid, 2-hydroxy-3,3-dimethyl-                        |               | 0.06          |               |               |               |
| Oxalic acid, isobutyl pentyl ester                            |               | 0.17          |               |               |               |
| Acrylic acid, 3-(1-methylcyclopropyl)-, E                     |               | 0.09          |               |               |               |
| 2-Hexenoic acid, 5-hydroxy-3,4,4-trimethyl-, (E)-             |               |               | 0.30          | 0.26          |               |
| Oxalic acid, allyl hexadecyl ester                            |               |               | 0.09          |               |               |
| Acetic acid, 3,7,11,15-tetramethyl-hexadecyl ester            |               |               | 0.25          |               |               |
| 1,2,4-Benzenetricarboxylic acid, 1,2-dimethyl ester           |               |               |               | 0.13          |               |

**Table S5. Details of furan derivatives formed during fast co-pyrolysis of cellulose and polypropylene of different feed composition at 500 °C.**

| <b>Components</b>                             | <b>C:PP<br/>100:0</b> | <b>C:PP<br/>75:25</b> | <b>C:PP<br/>50:50</b> | <b>C:PP<br/>25:75</b> | <b>C:PP<br/>0:100</b> |
|-----------------------------------------------|-----------------------|-----------------------|-----------------------|-----------------------|-----------------------|
| 2-Furaldehyde                                 | 1.82                  |                       |                       |                       |                       |
| 3-Furaldehyde                                 | 4.27                  | 0.65                  | 0.23                  |                       |                       |
| 5-Hydroxymethylfurfural                       | 5.04                  | 2.21                  |                       |                       |                       |
| 2(3H)-Furanone, dihydro-4-hydroxy-            | 2.79                  | 0.19                  |                       |                       |                       |
| 2(5H)-Furanone                                | 2.43                  | 0.75                  |                       |                       |                       |
| 2,4(3H,5H)-Furandione, 3-methyl-              | 0.56                  |                       |                       |                       |                       |
| 2,5-Dimethyl-4-hydroxy-3(2H)-furanone         | 2.07                  | 0.51                  |                       |                       |                       |
| 2,5-Furandicarboxaldehyde                     | 1.65                  |                       |                       |                       |                       |
| 2,5-Furandione, 3-methyl-                     | 0.24                  |                       |                       |                       |                       |
| 2-Furancarboxaldehyde, 5-methyl-              | 4.01                  | 2.09                  | 1.46                  |                       |                       |
| 2-Furanmethanediol, dipropionate              | 0.44                  |                       |                       |                       |                       |
| 2-Furanmethanol                               | 0.61                  |                       |                       |                       |                       |
| 4-Methyl-5H-furan-2-one                       | 0.75                  | 0.24                  |                       |                       |                       |
| Furan, 2-propyl-                              | 0.09                  |                       |                       |                       |                       |
| Furan, 3-methyl-                              | 0.31                  | 0.12                  |                       |                       |                       |
| 1-Propanone, 1-(2-furanyl)-                   | 0.18                  |                       |                       |                       |                       |
| 5-Acetoxyethyl-2-furaldehyde                  | 0.24                  |                       |                       |                       |                       |
| 2-Furanmethanol, tetrahydro-5-methyl-, trans- | 0.07                  |                       |                       |                       |                       |
| 6-Hydroxyhexahydrocyclopenta[b]furan-2-one    | 0.24                  | 0.4                   | 0.34                  | 0.81                  |                       |
| Furan, 2,5-dimethyl-                          | 0.21                  | 0.45                  |                       |                       |                       |
| 2,4-Dihydroxy-2,5-dimethyl-3(2H)-furan-3-one  |                       | 0.55                  |                       |                       |                       |
| 3-Methyl-2-(2-oxopropyl)furan                 |                       | 0.53                  |                       | 0.05                  |                       |
| 3-Furancarboxylic acid, methyl ester          |                       | 0.51                  |                       |                       |                       |
| 3-Furanmethanol                               |                       | 0.14                  | 0.27                  |                       |                       |
| 2(5H)-Furanone, 5-(1-methylethyl)-            |                       | 0.89                  |                       |                       |                       |
| 2,2,3,3,4,4-Hexamethyltetrahydrofuran         |                       | 0.05                  |                       | 0.07                  |                       |
| 2-Furanacetic acid, -hydroxy-                 |                       | 0.27                  |                       |                       |                       |
| Benzofuran, 2-methyl-                         |                       |                       | 0.20                  |                       |                       |
| 2(3H)-Furanone, 5-acetyldihydro-              |                       |                       | 0.26                  |                       |                       |

**Table S6. Details of anhydrosugars formed during fast co-pyrolysis of cellulose and polypropylene of different feed composition at 500 °C.**

| <b>Components</b>                                                                                       | <b>C:PP<br/>100:0</b> | <b>C:PP<br/>75:25</b> | <b>C:PP<br/>50:50</b> | <b>C:PP<br/>25:75</b> | <b>C:PP<br/>0:100</b> |
|---------------------------------------------------------------------------------------------------------|-----------------------|-----------------------|-----------------------|-----------------------|-----------------------|
| 1,4:3,6-Dianhydro- $\alpha$ -d-glucopyranose                                                            | 1.70                  | 1.45                  | 2.06                  | 0.89                  |                       |
| 1,6:2,3-Dianhydro-4-O-acetyl- $\beta$ -d-gulopyranose                                                   | 1.59                  |                       |                       |                       |                       |
| 2,3-Anhydro-d-mannosan                                                                                  | 0.96                  | 0.05                  |                       | 0.4                   |                       |
| 2H-Pyran-2,6(3H)-dione                                                                                  | 1.28                  |                       |                       |                       |                       |
| 2H-Pyran-3(4H)-one, dihydro-6-methyl-                                                                   | 0.10                  |                       |                       |                       |                       |
| 3,4-Anhydro-d-galactosan                                                                                | 1.29                  | 0.72                  | 0.36                  |                       |                       |
| 4H-Pyran-4-one, 2,3-dihydro-3,5-dihydroxy-6-methyl-                                                     | 2.11                  |                       | 0.31                  |                       |                       |
| 4H-Pyran-4-one, 3,5-dihydroxy-2-methyl-                                                                 | 3.44                  | 2.57                  |                       |                       |                       |
| $\alpha$ -D-Mannopyranoside, methyl 3,6-anhydro-                                                        | 0.43                  |                       |                       |                       |                       |
| Levogluosenone                                                                                          | 2.41                  | 1.49                  | 0.2                   | 0.13                  |                       |
| Tetrahydro-4H-pyran-4-ol                                                                                | 1.86                  |                       |                       |                       |                       |
| $\alpha$ -D-Glucopyranoside, O- $\alpha$ -D-glucopyranosyl-<br>(1.fwdarw.3)- $\beta$ -D-fructofuranosyl | 0.10                  | 0.04                  |                       |                       |                       |
| 1,6:2,3-Dianhydro-4-deoxy- $\beta$ -d-ribo-hexopyranose                                                 |                       | 0.23                  |                       |                       |                       |
| 6-Acetyl- $\beta$ -d-mannose                                                                            |                       | 0.08                  |                       |                       |                       |
| 2H-Pyran-2-one, tetrahydro-6,6-dimethyl-                                                                |                       | 0.10                  |                       |                       |                       |
| Indeno[3a,4-b]oxiren-2-ol, octahydro-4a-methyl-5-<br>[(tetrahydro-2H-pyran-2-yl)oxy]-                   |                       | 0.39                  |                       |                       |                       |
| 1,6:3,4-Dianhydro-2-deoxy- $\beta$ -d-lyxo-hexopyranose                                                 |                       |                       |                       | 0.29                  |                       |

**Table S7. C, H and O composition of C:PP feed mixtures and bio-oils obtained at 500 °C.**

| <b>Feed Composition<br/>Cellulose:PP<br/>(wt./wt.)</b> | <b>Feed composition (%)</b> |          |          | <b>Bio-oil composition<br/>(%)*</b> |          |          | <b>Deoxygenation<br/>(%)</b> |
|--------------------------------------------------------|-----------------------------|----------|----------|-------------------------------------|----------|----------|------------------------------|
|                                                        | <b>C</b>                    | <b>H</b> | <b>O</b> | <b>C</b>                            | <b>H</b> | <b>O</b> |                              |
| 100:0                                                  | 44.44                       | 6.17     | 49.38    | 51.69                               | 5.56     | 29.82    | 39.62                        |
| 75:25                                                  | 54.75                       | 8.20     | 37.04    | 64.31                               | 9.31     | 12.27    | 66.88                        |
| 50:50                                                  | 65.07                       | 10.23    | 24.69    | 66.02                               | 10.51    | 6.54     | 73.53                        |
| 25:75                                                  | 75.39                       | 12.26    | 12.35    | 67.30                               | 10.92    | 4.66     | 62.30                        |

\* - Bio-oil composition was calculated using GC/MS product analysis

**Table S8. Composition and carbon number of key products formed when cellulose and PP were co-pyrolyzed in equal composition (C:PP 50:50) at 500 °C.**

| Components                                            | Carbon no. | Composition (%) |
|-------------------------------------------------------|------------|-----------------|
| <b>Alcohols</b>                                       |            |                 |
| (2,4,6-Trimethylcyclohexyl) methanol                  | C10        | 5.30            |
| 2-Isopropyl-5-methyl-1-heptanol                       | C10        | 3.52            |
| 11-Methyldodecanol                                    | C13        | 3.17            |
| 1-Dodecanol, 2-hexyl-                                 | C18        | 2.91            |
| 11,13-Dimethyl-12-tetradecen-1-ol acetate             | C18        | 2.71            |
| 1-Dodecanol, 3,7,11-trimethyl-                        | C15        | 2.00            |
| 11-Dodecen-1-ol, 2,4,6-trimethyl-                     | C15        | 1.19            |
| 2-Hexyl-1-octanol                                     | C14        | 1.12            |
| 1-Octanol, 2-butyl-                                   | C12        | 0.92            |
| Methyl tetrahydroionol                                | C14        | 0.91            |
| 1-Decanol, 2-hexyl-                                   | C16        | 0.90            |
| 3-Nonen-1-ol, (E)-                                    | C9         | 0.44            |
| 3-Hepten-1-ol                                         | C7         | 0.43            |
| 5-Hepten-2-ol, 6-methyl-                              | C8         | 0.38            |
| 2,6-Dimethyl-octa-2,6-dien-1-ol                       | C10        | 0.36            |
| 1-Decanol, 2-octyl-                                   | C18        | 0.32            |
| 1-(1-Propynyl)cyclohexanol                            | C9         | 0.26            |
| Cyclopropanol, 1-(3,7-dimethyl-1-octenyl)-            | C13        | 0.20            |
| <i>Other alcohols with individual yield &lt;0.2%</i>  |            | 0.65            |
| <b>Hydrocarbons</b>                                   |            |                 |
| 2,4-Dimethyl-1-heptene                                | C9         | 4.07            |
| Eicosene, (E)-                                        | C20        | 4.00            |
| Cyclooctane, 1,4-dimethyl-, trans-                    | C10        | 2.25            |
| Propene                                               | C3         | 2.17            |
| Pentane                                               | C5         | 1.85            |
| Heptane, 4-methyl-                                    | C8         | 1.80            |
| 1-Pentene, 2-methyl-                                  | C6         | 1.72            |
| 1-Pentene, 2,4-dimethyl-                              | C7         | 1.60            |
| 2-Undecene, 4,5-dimethyl-                             | C13        | 1.24            |
| Nonane, 2-methyl-3-methylene-                         | C11        | 1.21            |
| Cyclotetradecane, 1,7,11-trimethyl-4-(1-methylethyl)- | C20        | 0.94            |
| 1-Heptene, 6-methyl-                                  | C8         | 0.87            |
| 2-Hexene, 3,5-dimethyl-                               | C8         | 0.78            |

|                                                                 |     |             |
|-----------------------------------------------------------------|-----|-------------|
| Cyclopentane, 1,1'-[3-(2-cyclopentylethyl)-1,5-pentanediy] bis- | C22 | 0.73        |
| Cyclopropane, trimethylmethylene-                               | C7  | 0.73        |
| Heptane, 5-ethyl-2-methyl-                                      | C10 | 0.70        |
| 1-Hexyne, 5-methyl-                                             | C7  | 0.67        |
| 1,7-Dimethyl-4-(1-methylethyl)cyclodecane                       | C15 | 0.63        |
| 1-Decene, 2,4-dimethyl-                                         | C12 | 0.63        |
| 1-Methylpentyl cyclopropane                                     | C9  | 0.59        |
| Cyclohexane, 1,3,5-trimethyl-                                   | C9  | 0.57        |
| Cyclohexane, 1,2,3,4,5,6-hexaethyl-                             | C12 | 0.57        |
| Cyclopentane, 1,2,3,4,5-pentamethyl-                            | C10 | 0.50        |
| Cyclohexane, 1,2,3-trimethyl-                                   | C9  | 0.48        |
| Nonane, 2,6-dimethyl-                                           | C11 | 0.48        |
| 1-Nonene, 4,6,8-trimethyl-                                      | C12 | 0.47        |
| 2,3,3-Trimethyl-1-hexene                                        | C9  | 0.46        |
| 9-Hexacosene                                                    | C26 | 0.41        |
| 1-Hexene, 4,5-dimethyl-                                         | C8  | 0.38        |
| Cyclohexane, 1,2-diethyl-3-methyl-                              | C11 | 0.38        |
| 1-Octyne                                                        | C8  | 0.37        |
| 1,3-Pentadiene, 2,4-dimethyl-                                   | C7  | 0.35        |
| 2,4-Dimethyl 1,4-pentadiene                                     | C7  | 0.34        |
| 2-Methyl-Z-4-tetradecene                                        | C15 | 0.33        |
| Cyclohexane, 2,4-diethyl-1-methyl-                              | C11 | 0.31        |
| 2-Hexadecene, 3,7,11,15-tetramethyl-                            | C10 | 0.29        |
| Cyclopentane, (3-methylbutyl)-                                  | C10 | 0.29        |
| 3,5-Dimethylcyclopentene                                        | C7  | 0.28        |
| Dodecane, 1-cyclopentyl-4-(3-cyclopentylpropyl)-                | C25 | 0.28        |
| 2-Decene, 4-methyl-, (Z)-                                       | C11 | 0.27        |
| 1-Hexene, 3,3,5-trimethyl-                                      | C9  | 0.25        |
| 1-Undecene, 8-methyl-                                           | C12 | 0.24        |
| Heptane, 2-methyl-3-methylene-                                  | C9  | 0.24        |
| 2-Heptene, 4-methyl-, (E)-                                      | C8  | 0.23        |
| Cyclopentane, 1,3-dimethyl-, cis-                               | C7  | 0.23        |
| 1,3-Dimethyl-1-cyclohexene                                      | C8  | 0.21        |
| 1-Nonyne                                                        | C9  | 0.21        |
| 3-Octene, 2,2-dimethyl-                                         | C10 | 0.20        |
| Dodecane, 2,6,11-trimethyl-                                     | C15 | 0.20        |
| <i>Other hydrocarbons with individual yield &lt;0.2%</i>        |     | <i>1.11</i> |
|                                                                 |     |             |



| <b>Others</b>                                |     |      |
|----------------------------------------------|-----|------|
| 1,2-Cyclopentanedione                        | C5  | 1.01 |
| 2-Cyclopenten-1-one, 2-hydroxy-              | C6  | 0.81 |
| 2-Cyclopenten-1-one, 2-hydroxy-3-methyl-     | C6  | 0.80 |
| 5-Ethyl-4-tridecanone                        | C15 | 0.63 |
| <i>Other Aldehydes/Ketones/Acids</i>         |     | 3.19 |
| 2-Furancarboxaldehyde, 5-methyl-             | C6  | 1.46 |
| <i>Other Furans</i>                          |     | 1.30 |
| 1,4:3,6-Dianhydro- $\alpha$ -d-glucopyranose | C6  | 2.06 |
| <i>Other Anhydrosugars</i>                   |     | 0.87 |

**Table S9. Higher heating values (HHVs) of feed and products during fast co-pyrolysis of cellulose and polypropylene.**

| <b>C:PP (wt./wt.) →</b>                               |               | <b>100:0</b> | <b>75:25</b> | <b>50:50</b> | <b>25:75</b> | <b>0:100</b> |
|-------------------------------------------------------|---------------|--------------|--------------|--------------|--------------|--------------|
| <b>Experimental HHV (MJ kg<sup>-1</sup>)</b>          | <b>Feed</b>   | 15.54        | 26.38        | 29.62        | 39.78        | 46.47        |
|                                                       | <b>500 °C</b> | 21.7         | 36.00        | 40.43        | 40.97        | 43.23        |
| <b>Calculated HHV of bio-oil (MJ kg<sup>-1</sup>)</b> | <b>600 °C</b> | -            | 39.00        | 40.77        | 41.58        | -            |
|                                                       | <b>700 °C</b> | -            | 38.76        | 40.75        | 41.40        | -            |
|                                                       | <b>800 °C</b> | -            | 38.70        | 37.72        | 40.60        | -            |
